# Supplementary material
Source: Springer Nature journal article supplement (https://www.springermedizin.de/resource/supplementary/13002_2011_240_MOESM2_ESM.pdf/9627450)

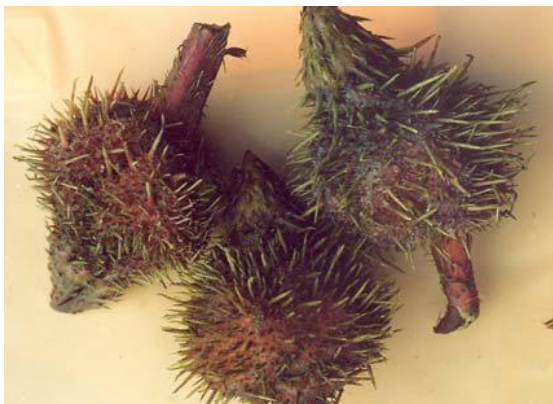

A

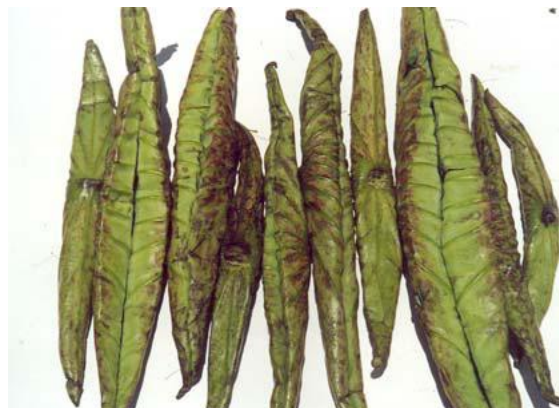

B

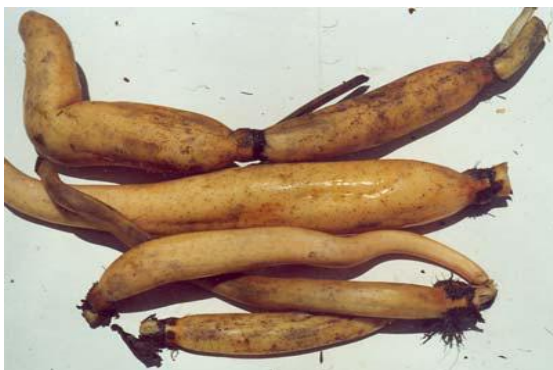

C

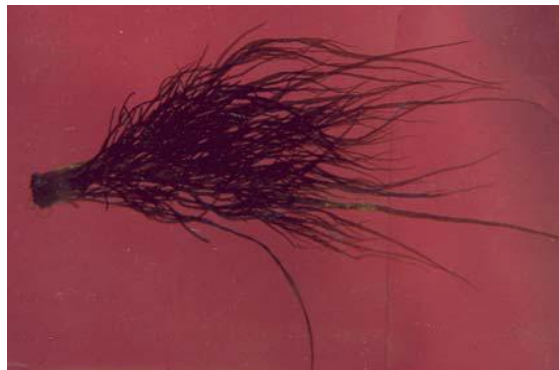

D

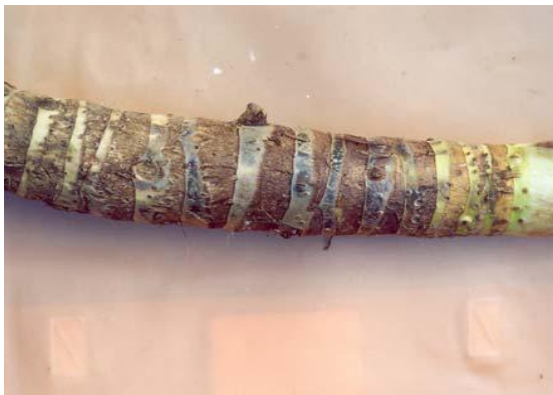

E

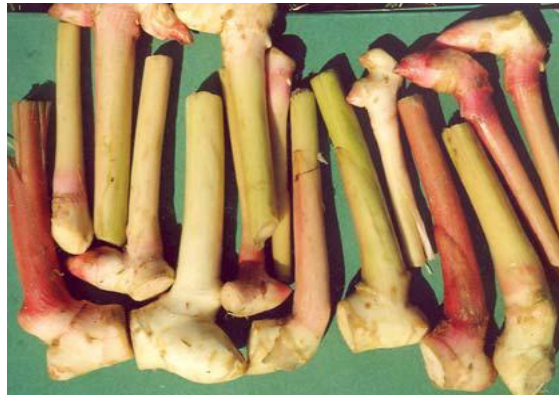

F

Supplement: MOESM2 [file 9627450]
